# Supplementary material for: What methods are used to apply positive deviance within healthcare organisations? A systematic review
Source: PubMed Central journal article supplement — BMJ Qual Saf. 2015 Nov 20;25(3):190–201. doi: 10.1136/bmjqs-2015-004386 (PMC4789698; doi:10.1136/bmjqs-2015-004386), 2015-11-20
Supplement: bmjqs-2015-004386-s2.pdf [file bmjqs-2015-004386-s2.pdf]

**Supplementary file 2 – Search strategy results and a worked example as applied to Web of Science**

| <b>List of sources searched:</b>     | <b>Start date of each database</b> | <b>End date of search</b> | <b>Total number of results found</b> |
|--------------------------------------|------------------------------------|---------------------------|--------------------------------------|
| <b>PsycINFO</b>                      | 1806                               | 9/1/14                    | 88                                   |
|                                      |                                    | 19/9/14                   | 81                                   |
| <b>Medline</b>                       | 1946                               | 9/1/14                    | 114                                  |
|                                      |                                    | 19/9/14                   | 111                                  |
| <b>Web of Sci</b>                    | 1900                               | 9/1/14                    | 222                                  |
|                                      |                                    | 19/9/14                   | 249                                  |
| <b>Cochrane</b>                      | 2005                               | 9/1/14                    | 4 trials and 1 review                |
|                                      |                                    | 19/9/14                   | 7 trials and 1 review                |
| <b>Embase</b>                        | 1947                               | 9/1/14                    | 130                                  |
|                                      |                                    | 19/9/14                   | 151                                  |
| <b>CINAHL</b>                        | 1981                               | 9/1/14                    | 52                                   |
|                                      |                                    | 19/9/14                   | 66                                   |
| <b>Global healthcare</b>             | 1910                               | 9/1/14                    | 66                                   |
|                                      |                                    | 19/9/14                   | 70                                   |
| <b>Science Direct</b>                | 1995                               | 9/1/14                    | 298                                  |
|                                      |                                    | 19/9/14                   | 263                                  |
|                                      |                                    |                           |                                      |
| <b>Totals (including duplicates)</b> |                                    | 9/1/14                    | <b>975</b>                           |
|                                      |                                    | 19/9/14                   | <b>783</b>                           |

**Search strategy as applied to Web of Science:**

1. positive devian\*

**Subscribed Databases:**

**Web of Science Core Collection (1900-present)**

- Science Citation Index Expanded (1900-present)
- Social Sciences Citation Index (1900-present)
- Arts & Humanities Citation Index (1975-present)
- Conference Proceedings Citation Index- Science (1990-present)

- Conference Proceedings Citation Index- Social Science & Humanities (1990-present)
- Book Citation Index– Science (2005-present)
- Book Citation Index– Social Sciences & Humanities (2005-present)

**BIOSIS Citation Index** (1969-present)

**BIOSIS Previews** (1969-present)

**Data Citation Index** (1900-present)

- Science (1900-present)
- Social Sciences & Humanities (1900-present)

**KCI-Korean Journal Database** (1980-present)

**MEDLINE** (1950-present)

**SciELO Citation Index** (1997-present)
