# Supplementary material for: What methods are used to apply positive deviance within healthcare organisations? A systematic review
Source: PubMed Central journal article supplement — BMJ Qual Saf. 2015 Nov 20;25(3):190–201. doi: 10.1136/bmjqs-2015-004386 (PMC4789698; doi:10.1136/bmjqs-2015-004386), 2015-11-20
Supplement: bmjqs-2015-004386-s3.pdf [file bmjqs-2015-004386-s3.pdf]

## **Supplementary file 3 – Details of data extraction**

This file summarises the information extracted through the data extraction forms.

### **General Information:**

- Quality assessment score
- Publication type
- Healthcare organisations or predictor of a healthcare organisation
- Context of within which positive deviance is used
- Location of research

### **Positive deviance topic**

- Healthcare setting
- Behaviour or problem researched
- Study aims, objectives and /or hypotheses
- Key findings / conclusions
- Future research recommendations detailed in the paper
- Recommendations made regarding the positive deviance approach
- Resource required
- Generalizability of findings / methods used.

### **Definition of Positive Deviance**

- Positive deviance definition given
- Positive deviance process used
- Positively deviant behaviours identified - were positively deviant strategies 'deviant' or 'different'?

### **Stage 1: Identify positive deviants**

- Study design
- Overall sample (not just details of the positive deviants)
- Method / data used
- Timing for identifying positive deviants
- Data analysis used to identify positive deviants
- Unit of analysis
- Community and researcher roles
- Strengths and weaknesses for this stage of the research
- 

### **Stage 2: Generate hypotheses regarding positive deviance strategies**

- Study design
- Sample for this stage of the research
- Method and procedure used
- Factors assessed
- Factors identified - Do factors identified relate to systems, processes or outcomes?
- Data analysis
- Comparison group used

- Unit of analysis
- Outcome of research
- Community and researcher roles
- Strengths and weaknesses

**Stage 3: Test the positively deviant strategies in representative sample**

- Study design
- Sample
- Method and procedure
- Data / Measures used
- Data analysis
- Unit of analysis
- Outcome of research
- Community and researcher roles
- Strengths and weaknesses

**Stage 4: Disseminate the positively deviant strategies to the community**

- Study design
- Sample
- Methods / procedure
- Intervention description
- Unit of analysis
- Analysis conducted regarding dissemination
- Community and researcher roles
- Strengths and weaknesses
