# Supplementary material for: What methods are used to apply positive deviance within healthcare organisations? A systematic review
Source: PubMed Central journal article supplement — BMJ Qual Saf. 2015 Nov 20;25(3):190–201. doi: 10.1136/bmjqs-2015-004386 (PMC4789698; doi:10.1136/bmjqs-2015-004386), 2015-11-20
Supplement: bmjqs-2015-004386-s4.pdf [file bmjqs-2015-004386-s4.pdf]

## Supplementary file 4: Study design and methods used to identify positive deviants and generate hypotheses about how they succeed

Included studies are organised by setting (primary care, secondary care and regional / national level provision). Each row represents an included article (n=37). Rows grouped together by colour (grey or white) represent unique positive deviance projects (n = 22).

| Author and year         | Context of positive deviance and process used* | Stage 1 – Identifying positive deviants     |                                                                     |                                                                            | Stage 2 – Generating hypotheses about how positive deviants succeed                                                                     |                                                                                                                             |
|-------------------------|------------------------------------------------|---------------------------------------------|---------------------------------------------------------------------|----------------------------------------------------------------------------|-----------------------------------------------------------------------------------------------------------------------------------------|-----------------------------------------------------------------------------------------------------------------------------|
|                         |                                                | Design and main methods used                | Main criteria for positive deviance                                 | Time period positive deviance displayed for                                | Design and methods used                                                                                                                 | Comparison group used                                                                                                       |
| <b>Primary Care</b>     |                                                |                                             |                                                                     |                                                                            |                                                                                                                                         |                                                                                                                             |
| Bradley et al. 2012[54] | Single method<br>No process explicitly stated  | Quant – routine data (3 measures)           | Consistently higher performance                                     | 9 months                                                                   | Qual - 51 in depth interviews, 2 day site visits x 8 sites                                                                              | Most improved and consistently lowest performers                                                                            |
| Gabbay et al. 2013[21]  | Single method<br>Infer Bradley et al           | Quant – routine data (3 measures)           | Highest quintile of ranked surgeries                                | Ranked according to improvement over 18 months                             | Mixed methods – 2 surveys given to staff, 55 interviews                                                                                 | Lowest quintile of ranked surgeries<br>Everyone was included but hypotheses were developed by comparing with low performers |
| Taliani et al. 2013[20] | Single method<br>Infer Bradley et al           | Quant – routine data (3 measures)           | Highest tertile of ranked surgeries                                 | Ranked according to improvement over 18 months                             | Qual - 136 interviews                                                                                                                   | Lowest quintile of ranked surgeries<br>Everyone was included but hypotheses were developed by comparing with low performers |
| Kim et al. 2008[11]     | Single method<br>No process explicitly stated  | Quant coding of nurse-patient consultations | Nurses – top 10% on one measure; Patients – top 15% on two measures | Nurses – average over 12 consultations;<br>Patients – single consultations | Mixed methods – 34 interviews, 6 focus groups, minimal quant analysis to compare PDs with peers who did not communicate as effectively. | In essence only PDs                                                                                                         |

| Author and year              | Context of positive deviance and process used*    | Stage 1 – Identifying positive deviants |                                                                                         |                                             | Stage 2 – Generating hypotheses about how positive deviants succeed                                               |                                               |
|------------------------------|---------------------------------------------------|-----------------------------------------|-----------------------------------------------------------------------------------------|---------------------------------------------|-------------------------------------------------------------------------------------------------------------------|-----------------------------------------------|
|                              |                                                   | Design and main methods used            | Main criteria for positive deviance                                                     | Time period positive deviance displayed for | Design and methods used                                                                                           | Comparison group used                         |
| Kraschnewski et al. 2013[22] | Single method<br>No process explicitly stated     | Quant – routine data                    | Higher levels of weight counselling. The group provided half of all weight counselling. | 1 year                                      | Quant – routine and patient data                                                                                  | Everyone was included                         |
| Ma et al. 2012[23]           | Single method<br>No process explicitly stated     | Quant – routine data                    | Unclear what data were used in the analysis                                             | None stated                                 | Quant – routine and patient data                                                                                  | Everyone was included                         |
| Marsh et al. 2002[24]        | Single method<br>5 Step PD cycle – not referenced | Qual – local community meetings         | Descriptions of health status and behaviours                                            | None stated                                 | Qual – 27 situational analysis inquiries, 23 interviews, 4 focus groups, 5 PD inquiries (unclear what these were) | Compared to results of a situational analysis |
| Rose et al. 2012[25]         | Single method<br>No process explicitly stated     | Quant – unclear whether routine data    | Selected 3 sites within the top 10                                                      | 2 years                                     | Qual – 55 interviews, observation 4 hours (x 6 sites), document analysis                                          | Selected 3 sites within the bottom 10         |
| <b>Secondary Care</b>        |                                                   |                                         |                                                                                         |                                             |                                                                                                                   |                                               |
| Abrahamson et al. 2011a[26]  | Single method<br>No process explicitly stated     | Stage not completed                     | -                                                                                       | -                                           | Qual – 30 minute structured telephone interviews                                                                  | PDs not identified                            |
| Abrahamson et al. 2011b[27]  | Single method<br>No process explicitly stated     | Stage not completed                     | -                                                                                       | -                                           | Qual – 30 minute structured telephone interviews                                                                  | PDs not identified                            |
| Anzarut et al. 2011[28]      | Single method<br>No process explicitly stated     | Stage not completed                     | -                                                                                       | -                                           | Quant - Survey                                                                                                    | PDs not identified                            |
| Curry et al. 2011[29]        | Single method<br>Infer Bradley et al.             | Quant – routine data                    | Hospitals within top 5%                                                                 | 2 years                                     | Qual – 1-2 day site visits x 11 sites, 158 interviews                                                             | Hospitals within bottom 5%                    |
| Cherlin et al. 2012[30]      | Single method<br>No process explicitly stated     | Quant – routine data                    | Hospitals within top 5%                                                                 | 3 years                                     | Qual – 1-2 day site visits x 11 sites, 158 interviews (57 interviews used for this analysis)                      | Hospitals within bottom 5%                    |
| Bradley et al. 2012[31]      | Single method<br>Infer Bradley et al.             | Stage done elsewhere                    | -                                                                                       | -                                           | Stage done elsewhere                                                                                              | -                                             |
| Landman et al. 2013[32]      | Single method<br>No process explicitly stated     | Stage done elsewhere                    | -                                                                                       | -                                           | Qual – 1-2 day site visits x 11 sites, 158 interviews (85 interviews used for this analysis)                      | Hospitals within bottom 5%                    |
| Griffith et al. 2013[10]     | Single method<br>No process explicitly stated     | Quant – national award                  | Winners of an award                                                                     | None stated                                 | Qual – document analysis (50 pages x 9 organisations)                                                             | PDs only                                      |

| Author and year               | Context of positive deviance and process used*                     | Stage 1 – Identifying positive deviants                       |                                                                           |                                             | Stage 2 – Generating hypotheses about how positive deviants succeed                                              |                         |
|-------------------------------|--------------------------------------------------------------------|---------------------------------------------------------------|---------------------------------------------------------------------------|---------------------------------------------|------------------------------------------------------------------------------------------------------------------|-------------------------|
|                               |                                                                    | Design and main methods used                                  | Main criteria for positive deviance                                       | Time period positive deviance displayed for | Design and methods used                                                                                          | Comparison group used   |
| Kennedy et al. 1999[33]       | Single method<br>No process explicitly stated                      | Quant – analysis of case notes                                | 6 point eligibility criteria, many of which do not infer high performance | 18 months                                   | Quant – quantitative analysis of a case note review                                                              | PDs only                |
| Lindberg & Schneider 2013[34] | Single method<br>Use the process discussed by Sterin and Choo 2000 | Unclear if stage was completed                                | No criteria                                                               | None stated                                 | Qual – orientation / PD training, DADs / meetings every week, site visits, document review                       | PDs were not identified |
| Lindberg et al. 2013[35]      | Complex intervention<br>No process explicitly stated               | Qual - DADs                                                   | No criteria                                                               | None stated                                 | Mixed methods – DADs (unclear how many), surveys, case study including observation, site visits and focus groups | Everyone was included   |
| Downham et al. 2012[36]       | Complex intervention<br>No process explicitly stated               | Stage done elsewhere                                          | -                                                                         | -                                           | Qual – DADs, ‘kick off’ sessions                                                                                 | Everyone was included   |
| Marra et al. 2010[37]         | Single method<br>No process explicitly stated                      | Qual – peer recommendation                                    | Description of healthcare workers attitudes                               | None stated                                 | Mixed methods – surveys, monitoring, bimonthly DADs, PD training                                                 | Everyone was included   |
| Marra et al. 2011[38]         | Single method<br>No process explicitly stated                      | Qual – peer recommendation                                    | Description of healthcare workers attitudes                               | None stated                                 | Mixed methods – surveys, monitoring, bimonthly DADs, PD training                                                 | Everyone was included   |
| de MacEdo et al. 2012[39]     | Single method<br>No process explicitly stated                      | Stage done elsewhere                                          | -                                                                         | -                                           | Mixed methods – surveys, monitoring, bi-monthly DADs                                                             | Everyone was included   |
| Marra et al. 2013[40]         | Single method<br>No process explicitly stated                      | Stage done elsewhere                                          | -                                                                         | -                                           | Stage done elsewhere                                                                                             | -                       |
| Zaldi et al. 2012[41]         | Single method<br>6 Ds process referenced by Marsh et al 2004       | Quant – non-routine data (2 measures)                         | Those who ranked well in both measures                                    | 1.5 months                                  | Qual – 20 interviews, 1 focus group                                                                              | PDs only                |
| Awad et al. 2009[42]          | Complex intervention<br>4 Ds process <sup>a</sup>                  | Mixed methods – unclear but infer data and observation / DADs | No criteria                                                               | None stated                                 | Unclear but inferred – DADs, site visits                                                                         | Everyone was included   |
| Bonuel et al. 2009[43]        | Complex intervention<br>No process explicitly stated               | Unclear if stage was completed                                | -                                                                         | -                                           | Unclear if stage was completed                                                                                   | -                       |
| Ellingson et al. 2011[44]     | Complex intervention<br>No process explicitly stated               | Unclear if stage was completed                                | -                                                                         | -                                           | Unclear if stage was completed                                                                                   | -                       |
| Evans et al. 2013[45]         | Complex intervention<br>No process explicitly stated               | Mixed methods – appear to use data and observation            | Those making “exceptional progress”                                       | None stated                                 | Unclear but inferred – DADs, workshops, interviews with PD consultants                                           | Everyone was included   |

| Author and year                          | Context of positive deviance and process used*       | Stage 1 – Identifying positive deviants                                                                          |                                                                                                                  |                                             | Stage 2 – Generating hypotheses about how positive deviants succeed                                                                         |                                                                                                       |
|------------------------------------------|------------------------------------------------------|------------------------------------------------------------------------------------------------------------------|------------------------------------------------------------------------------------------------------------------|---------------------------------------------|---------------------------------------------------------------------------------------------------------------------------------------------|-------------------------------------------------------------------------------------------------------|
|                                          |                                                      | Design and main methods used                                                                                     | Main criteria for positive deviance                                                                              | Time period positive deviance displayed for | Design and methods used                                                                                                                     | Comparison group used                                                                                 |
| Forsha et al. 2007[46]                   | Complex intervention<br>No process explicitly stated | Unclear if stage was completed                                                                                   | -                                                                                                                | -                                           | Unclear if stage was completed                                                                                                              | -                                                                                                     |
| Jain et al. 2011[47]                     | Complex intervention<br>No process explicitly stated | Unclear if stage was completed                                                                                   | -                                                                                                                | -                                           | Unclear if stage was completed                                                                                                              | -                                                                                                     |
| <b>Regional / National level / other</b> |                                                      |                                                                                                                  |                                                                                                                  |                                             |                                                                                                                                             |                                                                                                       |
| Awofeso et al. 2008[48]                  | Complex intervention<br>4 Ds process <sup>b</sup>    | Quant and qual data – surveys, non-routine data, observation                                                     | No criteria                                                                                                      | None stated                                 | Unclear what methods used                                                                                                                   | PDs only                                                                                              |
| Green et al. 2006[49]                    | Single method<br>No process explicitly stated        | Quant – routine data (3 measures) but also aware of high performance through other methods e.g. winning an award | Unclear whether this was based on data improvements or winning the award                                         | Unclear – possibly 1 year                   | Qual – interviews (quantified as 58000 words), 500 pages of document analysis, 100 hours of observation                                     | PDs only                                                                                              |
| Klaiman et al. 2013[50]                  | Multiple methods used<br>Bradley et al.              | Mixed methods – database review, self-select and peer recommendation                                             | No criteria                                                                                                      | Assume 1 year (length of the pandemic)      | Qual – 20 in depth interviews (15 interviews used for this analysis)                                                                        | PDs only                                                                                              |
| Klaiman et al. 2014[51]                  | Multiple methods used<br>Bradley et al.              | Mixed methods – database review, self-select and peer recommendation                                             | No criteria                                                                                                      | Assume 1 year (length of the pandemic)      | Qual – 20 in depth interviews (13 interviews used for this analysis)                                                                        | PDs only                                                                                              |
| Naimoli et al. 2008[52]                  | Complex intervention<br>No process explicitly stated | Quant – routine data                                                                                             | Immunization coverage history, populations size, status of World Bank support and feasibility of data collection | 6 years                                     | Qual - Key informant interviews, document review, case narratives constructed with participant involvement – all took 5-7 days in each site | Additional performance levels - medium high, medium low, low, those with exceptional characteristics. |
| <b>Primary and secondary care</b>        |                                                      |                                                                                                                  |                                                                                                                  |                                             |                                                                                                                                             |                                                                                                       |

| Author and year        | Context of positive deviance and process used* | Stage 1 – Identifying positive deviants |                                            |                                             | Stage 2 – Generating hypotheses about how positive deviants succeed |                                                |
|------------------------|------------------------------------------------|-----------------------------------------|--------------------------------------------|---------------------------------------------|---------------------------------------------------------------------|------------------------------------------------|
|                        |                                                | Design and main methods used            | Main criteria for positive deviance        | Time period positive deviance displayed for | Design and methods used                                             | Comparison group used                          |
| Assefa et al. 2014[53] | Single method<br>No process explicitly stated  | Quant – routine data (3 measures)       | Higher performance compared to a reference | Unclear whether 1 or 2 years                | Qual – 72 key informant interviews, 1 focus group                   | Facilities with lower and improved performance |

Abbreviations: Quant – quantitative date; Qual – qualitative date, PDs – positive deviants; DADs - Discovery and Action Dialogues

\* References for processes used - Bradley et al 2009[7]; Sterin and Choo 2000[67]; Marsh et al. 2004[6]; a - Sparks 2004;[68] b - Lapping et al 2002[69] (all references available within the main text).
